# Supplementary material for: Long non-coding RNA MFSD4A-AS1 promotes lymphangiogenesis and lymphatic metastasis of papillary thyroid cancer
Source: PubMed Central journal article supplement (PMC9986400; doi:10.1530/erc-22-0221), 2023-02-08

# Supplement Figure 2

## A

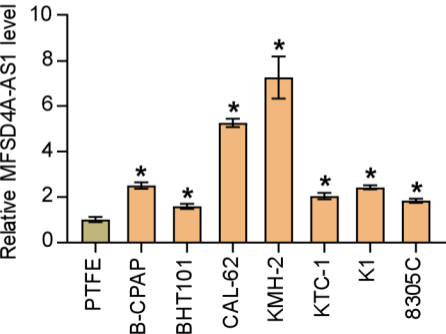

## B

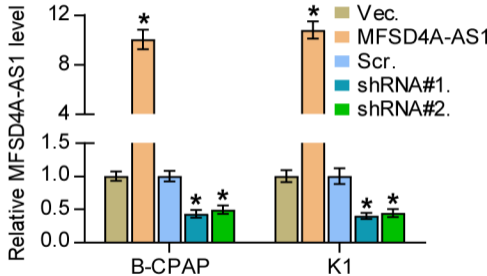

Supplement: supplementary_figure_2.pdf [file supplementary_figure_2.pdf]
