# Supplementary material for: Long non-coding RNA MFSD4A-AS1 promotes lymphangiogenesis and lymphatic metastasis of papillary thyroid cancer
Source: PubMed Central journal article supplement (PMC9986400; doi:10.1530/erc-22-0221), 2023-02-08
Supplement: supplementary_material.pdf [file supplementary_material.pdf]

**Supplemental Table 1. The basic information of 102 papillary thyroid carcinoma patients without distant metastasis for MFSD4A-AS1 RNA expression analysis.**

|                  |        | Cases (n) | Percentage (%) |
|------------------|--------|-----------|----------------|
| Histologic       | PTC    | 102       | 100.0          |
|                  | Other  | 0         | 0.0            |
| Gender           | Male   | 10        | 9.8            |
|                  | Female | 92        | 90.2           |
| Age              | <50    | 70        | 68.6           |
|                  | ≥50    | 32        | 31.4           |
| T classification | T1     | 39        | 38.2           |
|                  | T2     | 35        | 34.3           |
|                  | T3     | 22        | 21.6           |
|                  | T4     | 6         | 5.9            |
| N classification | N0     | 47        | 46.1           |
|                  | N1     | 55        | 53.9           |
| M classification | M0     | 102       | 100.0          |
|                  | M1     | 0         | 0.0            |

\* PTC: papillary thyroid carcinoma.

**Supplemental Table 2. A list of primers used in the reactions for clone PCR.**

| Gene                | Sequence (5' – 3')                                              |
|---------------------|-----------------------------------------------------------------|
| sh MFSD4A-AS1-1#-up | CCGGGCATATCCTGTACCATTAGGCTCGAGCCT<br>AAATGGTACAGGATATGCTTTTTTG  |
| sh MFSD4A-AS1-1#-dn | AATTCAAAAAGCATATCCTGTACCATTAGGCTC<br>GAGCCTAAATGGTACAGGATATGCT  |
| sh MFSD4A-AS1-2#-up | CCGGGCCTGTATAGCCCACAGAACTCTCGAGAG<br>TTCTGTGGGCTATACAGGCTTTTTTG |

|                     |                                                                 |
|---------------------|-----------------------------------------------------------------|
| sh MFSD4A-AS1-2#-dn | AATTCAAAAAGCCTGTATAGCCCACAGAACTCTC<br>GAGAGTTCTGTGGGCTATACAGGCT |
| MFSD4A-AS1-Luci-up  | ATGCAGTGGCATGATGGGTG                                            |
| MFSD4A-AS1-Luci-dn  | TGGGTAGGGACACAGACCTAAAC                                         |
| VEGFA-3`UTR-up      | AGGGTTTCGGGAACCAGATCTC                                          |
| VEGFA-3`UTR-dn      | GCTGGGTTTGTCGGTGTTC                                             |
| VEGFC-3`UTR-up      | CTGAAGCTTGTCAGCAGTCAAC                                          |
| VEGFC-3`UTR-dn      | CGGTGGCTCACACCTGTAATC                                           |

**Supplemental Table 3. A list of primers used in the reactions for real-time PCR.**

| Gene          | Sequence (5` – 3`)       |
|---------------|--------------------------|
| MFSD4A-AS1-up | GGCCGAAGCTGAAGAAGACG     |
| MFSD4A-AS1-dn | TTGTGCCTGTGAATAGCCACTG   |
| VEGFA-up      | TCTTCCAGGAGTACCCTGATGAG  |
| VEGFA-dn      | GCTGGCCTTGGTGAGGTTTG     |
| GAPDH-up      | TCCTCTGACTTCAACAGCGACAC  |
| GAPDH-dn      | CACCCTGTTGCTGTAGCCAAATTC |
| VEGFB-up      | CAAGTCCGGATGCAGATCCTC    |
| VEGFB-dn      | TCTGGCTTCACAGCACTGTC     |
| VEGFC-up      | GGCTGGCAACATAACAGAGAA    |
| VEGFC-dn      | CCCCACATCTATACACACCTCC   |
| VEGFD-up      | TCCCATCGGTCCACTAGGTTTG   |
| VEGFD-dn      | ACCACATCGGAACACGTTTAC    |
| PDGFA-up      | CGGATACCTCGCCCATGTTC     |
| PDGFA-dn      | CTCTCAGGCTGGTGTCCAAAG    |
| FGF2-up       | AGTGTGTGCTAACCGTTACCT    |
| FGF2-dn       | ACTGCCAGTTCGTTTCAGTG     |

|          |                        |
|----------|------------------------|
| EGF-up   | TGTCCACGCAATGTGTCTGAA  |
| EGF-dn   | CATTATCGGGTGAGGAACAACC |
| TGFB1-up | CGCGTGCTAATGGTGGAAAC   |
| TGFB1-dn | GCTTCTCGGAGCTCTGATGTG  |
| PDGFB-up | CCCGAGGAGCTTTATGAGATG  |
| PDGFB-dn | GGGAACCCAGGCTCCTTCTT   |
